# Supplementary material for: The relation between Blastocystis and the intestinal microbiota in Swedish travellers
Source: PubMed Central journal article supplement (PMC5725903; doi:10.1186/s12866-017-1139-7), 2017-12-11
Supplement: 12866_2017_1139_MOESM7_ESM.pdf [file 12866_2017_1139_MOESM7_ESM.pdf]

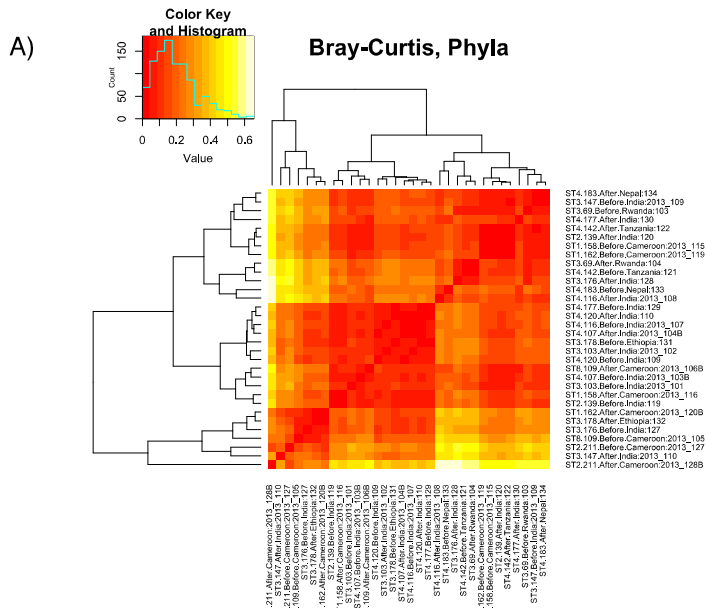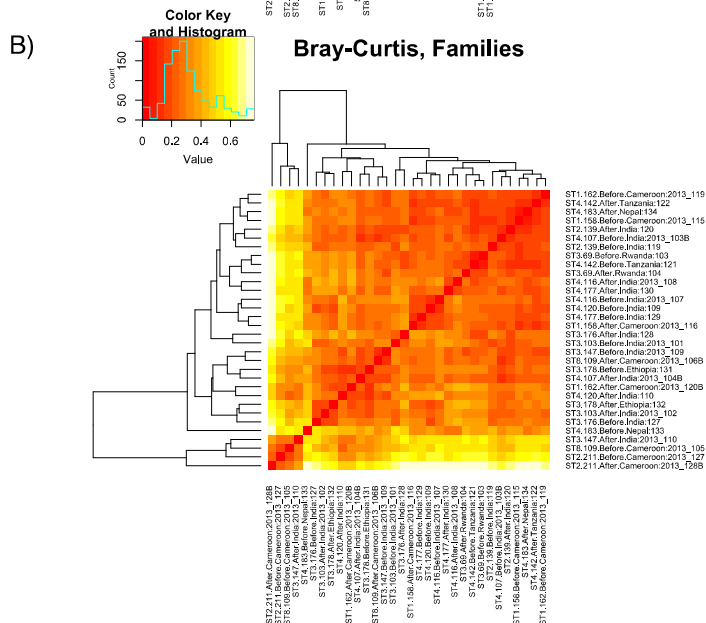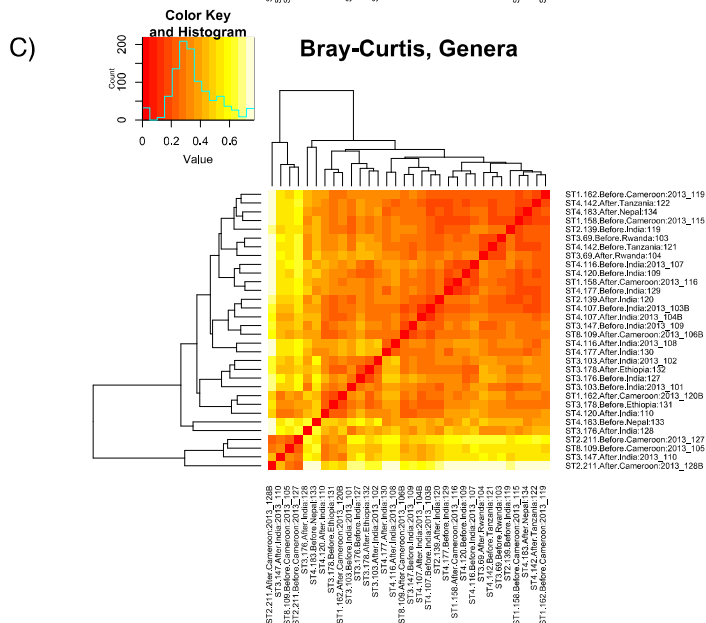

**Fig. S6.** Pairwise Bray-Curtis dissimilarity of the communities at the phylum (A), family (B) and genus (C) levels. Yellow/white corresponds to more dissimilar communities, while red corresponds to near-identical communities.
